# Supplementary material
Source: PubMed Central journal article supplement (PMC3290121)

Supplementary Figure 1.

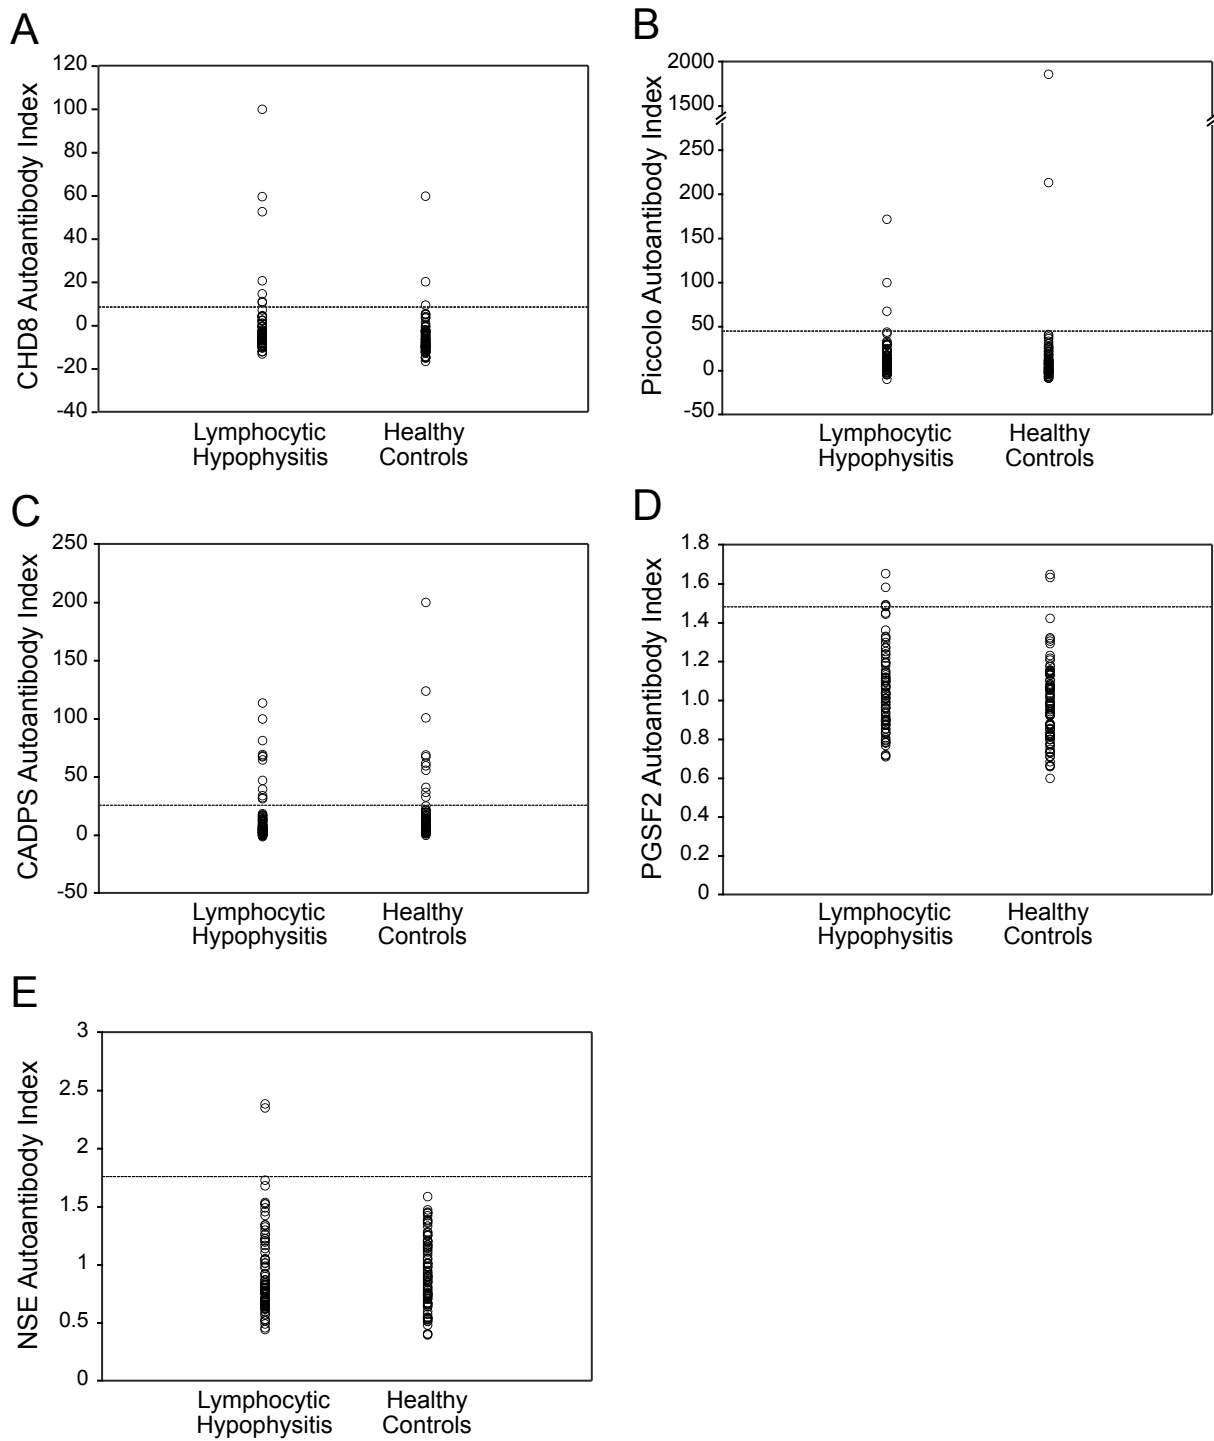

Supplement: supp_EJE-11-1015_11-1015-supfig.pdf [file supp_EJE-11-1015_11-1015-supfig.pdf]
